# Supplementary material for: Genomic data integration by WON-PARAFAC identifies interpretable factors for predicting drug-sensitivity in vivo
Source: PubMed Central journal article supplement (PMC6834616; doi:10.1038/s41467-019-13027-2), 2019-11-06
Supplement: 41467_2019_13027_MOESM3_ESM.pdf [file 41467_2019_13027_MOESM3_ESM.pdf]

## **Description of Additional Supplementary Files**

File Name: Supplementary Data 1

Description: 130 factors derived from pan-cancer cell lines and their associations to tissue type, pathways, and drug response. Data file includes factor loadings of PDXs from PDXE.
